# Supplementary material for: Autoinhibition of the Ron receptor tyrosine kinase by the juxtamembrane domain
Source: PubMed Central journal article supplement (PMC4021555; doi:10.1186/1478-811x-12-28), 2014-04-16

Figure S4

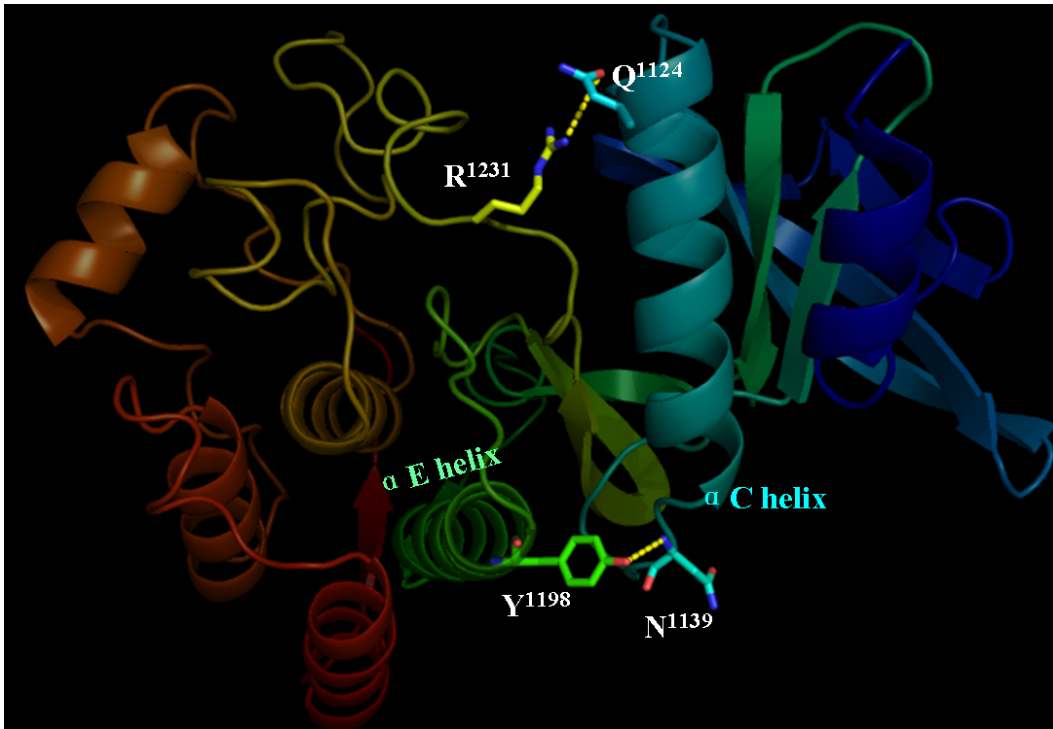

Supplement: 1478-811X-12-28-S4.pdf [file 1478-811X-12-28-S4.pdf]
