# Supplementary material for: Autoinhibition of the Ron receptor tyrosine kinase by the juxtamembrane domain
Source: PubMed Central journal article supplement (PMC4021555; doi:10.1186/1478-811x-12-28), 2014-04-16
Supplement: 1478-811X-12-28-S5.pdf [file 1478-811X-12-28-S5.pdf]

| MUTANT                     | FORWARD PRIMER                                      |
|----------------------------|-----------------------------------------------------|
| Ron <sup>1012Y-A</sup>     | 5'-CCCCTGCCTATTCTGGCCTCGGGCTCTGAC-3'                |
| Ron <sup>1012Y-E</sup>     | 5'-CCCCTGCCTATTCTGGAATCGGGCTCTGAC-3'                |
| Ron <sup>1012Y-F</sup>     | 5'-CCCCTGCCTATTCTGTTCTCGGGCTCTGAC-3'                |
| Ron <sup>1017Y-A</sup>     | 5'-GTACTCGGGCTCTGACGCCAGAAGTGGCCTTGC-3'             |
| Ron <sup>1017Y-E</sup>     | 5'-GTACTCGGGCTCTGACGAAAGAAGTGGCCTTGC-3'             |
| Ron <sup>1017Y-F</sup>     | 5'-GTACTCGGGCTCTGACTTCAGAAGTGGCCTTGC-3'             |
| Ron <sup>1013AGSAYA</sup>  | 5'-CCTGCCTATTCTGTACGCGGGCTCTGCCTACGCAAGTGGCCTTGC-3' |
| Ron <sup>Δ1020-1029</sup>  | 5'-CTGACTACAGAAGTGATTCCACCACTTG-3'                  |
| Ron <sup>1044E-A</sup>     | 5'-CCTTCTCCGATAGTGCAGATGAATCCTGTGTGCCAC -3'         |
| Ron <sup>1045D-A</sup>     | 5'-CCTTCTCCGATAGTGAAGCTGAATCCTGTGTGCCAC -3'         |
| Ron <sup>1046E-A</sup>     | 5'-CCTTCTCCGATAGTGAAGATGCATCCTGTGTGCCAC-3'          |
| Ron <sup>1044EDE-AAA</sup> | 5'-CCTTCTCCGATAGTGCAGCTGCATCCTGTGTGCCAC-3'          |
| Ron <sup>3S-A</sup>        | 5'-GTCCATGGAGCAGCCTTCGCCGATGCTGAAGATGAATCC-3'       |
| Ron <sup>4S-A</sup>        | 5'-GAAGATGAAGCCTGTGTGCCACTGCTGCG-3'                 |
| Ron <sup>1198Y-F</sup>     | 5'-CCGCGGCATGGAGTTCCTGGCAGAGCAG-3'                  |
| Ron <sup>1254M-1</sup>     | 5'-CCTGTGAAGTGGACGGCGCTGGAGAGCC-3'                  |
